# Supplementary material for: Physical Activity Profiles among Patients Admitted with Acute Exacerbations of Chronic Obstructive Pulmonary Disease
Source: MDPI journal article supplement (doi:10.3390/jcm12154914), 2023-07-26
Supplement: s1 [file s1]

**Supplement Table S1.** Results from exploratory linear/logistic regression analyses evaluating the ability of inpatient PA variables to predict clinical outcomes when expressed in various ways.

*Note:* Each outcome depicted sequentially a-h. Data represents coefficient of determination explanatory power values ( $R^2$  or Pseudo  $R^2$ ).

**Outcome a: Length of stay >5 days (y/n)**

|                           | Steps/day | Sedentary, % time/day | Light, % time/day | MVPA, % time/day |
|---------------------------|-----------|-----------------------|-------------------|------------------|
| Overall mean              | .         | 9.8                   | 9.6               | .                |
| First available day       | .         | 12                    | 12.1              | .                |
| Last available day        | .         | 7                     | 6.8               | .                |
| Nadir inpatient value     | .         | .                     | 18.7              | 8.1              |
| Peak inpatient value      | .         | 18.3                  | .                 | .                |
| Delta (last - first data) | 7.2       | 9.1                   | 9.2               | .                |
| <i>Mean</i>               | 7.2       | 11.2                  | 11.3              | 8.1              |

**Outcome b: Length of stay, days**

|                           | Steps/day | Sedentary, % time/day | Light, % time/day | MVPA, % time/day |
|---------------------------|-----------|-----------------------|-------------------|------------------|
| Overall mean              | .         | 10.6                  | 10.3              | .                |
| First available day       | .         | 12.6                  | 11.3              | .                |
| Last available day        | .         | 10.9                  | 10.6              | .                |
| Nadir inpatient value     | .         | .                     | 22.0              | 8.0              |
| Peak inpatient value      | .         | 20.7                  | .                 | .                |
| Delta (last - first data) | 13.8      | 10.7                  | 10.7              | .                |
| <i>Mean</i>               | 13.8      | 13.1                  | 13.0              | 8.0              |

**Outcome c: Censored for readmission or death within 90 days of discharge (y/n)**

|                           | Steps/day | Sedentary, % time/day | Light, % time/day | MVPA, % time/day |
|---------------------------|-----------|-----------------------|-------------------|------------------|
| Overall mean              | .         | .                     | .                 | .                |
| First available day       | .         | .                     | .                 | .                |
| Last available day        | .         | .                     | .                 | .                |
| Nadir inpatient value     | .         | .                     | .                 | .                |
| Peak inpatient value      | .         | .                     | .                 | .                |
| Delta (last - first data) | .         | .                     | .                 | .                |
| <i>Mean</i>               | .         | .                     | .                 | .                |

**Outcome d: Mean >1000 steps/day change from discharge to follow-up (y/n)**

|                           | Steps/day | Sedentary, % time/day | Light, % time/day | MVPA, % time/day |
|---------------------------|-----------|-----------------------|-------------------|------------------|
| Overall mean              | .         | .                     | .                 | .                |
| First available day       | .         | .                     | .                 | .                |
| Last available day        | .         | .                     | .                 | .                |
| Nadir inpatient value     | .         | .                     | .                 | .                |
| Peak inpatient value      | .         | .                     | .                 | .                |
| Delta (last - first data) | .         | .                     | .                 | .                |
| <i>Mean</i>               | .         | .                     | .                 | .                |

**Outcome e: Mean steps/day at follow-up**

|                           | Steps/day | Sedentary, % time/day | Light, % time/day | MVPA, % time/day |
|---------------------------|-----------|-----------------------|-------------------|------------------|
| Overall mean              | 6         | .                     | .                 | .                |
| First available day       | 6.7       | .                     | .                 | .                |
| Last available day        | .         | .                     | .                 | .                |
| Nadir inpatient value     | .         | .                     | .                 | .                |
| Peak inpatient value      | .         | .                     | .                 | .                |
| Delta (last - first data) | .         | .                     | .                 | .                |
| <i>Mean</i>               | 6.4       | .                     | .                 | .                |

**Outcome f: Mean % time spent sedentary/day at follow-up**

|                           | Steps/day | Sedentary, % time/day | Light, % time/day | MVPA, % time/day |
|---------------------------|-----------|-----------------------|-------------------|------------------|
| Overall mean              | .         | 11                    | 10.6              | 7.5              |
| First available day       | .         | 9.5                   | 8.8               | 6.3              |
| Last available day        | .         | 8.7                   | 8.2               | 7.1              |
| Nadir inpatient value     | .         | 8.4                   | 8.9               | .                |
| Peak inpatient value      | .         | 9.3                   | 8                 | 8.6              |
| Delta (last - first data) | .         | .                     | .                 | .                |
| <i>Mean</i>               | .         | 9.4                   | 8.9               | 7.4              |

**Outcome g: Mean % time spent in light PA/day at follow-up**

|                           | Steps/day | Sedentary, % time/day | Light, % time/day | MVPA, % time/day |
|---------------------------|-----------|-----------------------|-------------------|------------------|
| Overall mean              | .         | 12.6                  | 12.2              | 6.8              |
| First available day       | .         | 10.4                  | 9.8               | .                |
| Last available day        | .         | 10                    | 9.6               | 6.4              |
| Nadir inpatient value     | .         | 10.2                  | 9.3               | .                |
| Peak inpatient value      | .         | 9.6                   | 9.8               | 7.8              |
| Delta (last - first data) | .         | .                     | .                 | .                |
| <i>Mean</i>               | .         | 10.6                  | 10.1              | 7.0              |

**Outcome h: Mean % time spent in MVPA/day at follow-up**

|                           | Steps/day | Sedentary, % time/day | Light, % time/day | MVPA, % time/day |
|---------------------------|-----------|-----------------------|-------------------|------------------|
| Overall mean              | .         | .                     | .                 | .                |
| First available day       | .         | .                     | .                 | .                |
| Last available day        | .         | .                     | .                 | .                |
| Nadir inpatient value     | .         | .                     | .                 | .                |
| Peak inpatient value      | .         | .                     | .                 | .                |
| Delta (last - first data) | .         | .                     | .                 | .                |
| <i>Mean</i>               | .         | .                     | .                 | .                |
